# Supplementary material
Source: MDPI journal article supplement (https://www.mdpi.com/2073-4441/13/18/2501)
Supplement: s1 [file s1]

**Table S1.** Chemical properties of the reed biochar under different pyrolysis temperature.

| Pyrolysis temperature | Productivity %     | Element Composition |      |       |      | Atomic Ratio |        |      |      | pH    | SAGs |
|-----------------------|--------------------|---------------------|------|-------|------|--------------|--------|------|------|-------|------|
|                       |                    | C                   | H    | O     | N    | Ash content  | C:N    | O:C  | H:C  |       |      |
| 300                   | 44.3a <sup>1</sup> | 59.50b              | 3.88 | 28.75 | 0.67 | 7.2          | 88.81  | 0.48 | 0.07 | 8.21  | 2.73 |
| 400                   | 41.2a              | 57.56b              | 2.84 | 31.8  | 0.70 | 7.1          | 82.23  | 0.55 | 0.05 | 7.83  | 2.17 |
| 500                   | 39.6ab             | 58.94b              | 2.29 | 29.97 | 0.80 | 8.0          | 73.68  | 0.51 | 0.04 | 7.75  | 1.72 |
| 600                   | 32.5c              | 68.90a              | 2.18 | 17.86 | 0.86 | 10.2         | 80.12  | 0.26 | 0.03 | 9.12  | 1.06 |
| 700                   | 31.2c              | 71.34a              | 1.42 | 16.11 | 0.33 | 10.8         | 216.18 | 0.23 | 0.02 | 10.33 | 0.87 |

<sup>1</sup> Different letters indicate significant differences between samples under different pyrolysis temperature ( $p < 0.05$ ).

**Table S2.** Physical properties of the reed biochar under different pyrolysis temperature.

| Pyrolysis temperature (°C) | Specific surface area (m <sup>2</sup> /g) | Microporous surface area (m <sup>2</sup> /g) | Total pore volume (m <sup>3</sup> /g) | Mesopore volume (m <sup>3</sup> /g) | Average aperture (Å) |
|----------------------------|-------------------------------------------|----------------------------------------------|---------------------------------------|-------------------------------------|----------------------|
| 300                        | 1.03d <sup>1</sup>                        | 0.03c                                        | 0.001c                                | --                                  | 51.70a               |
| 400                        | 4.51d                                     | 1.08c                                        | 0.0035c                               | 0.0025c                             | 30.83b               |
| 500                        | 91.58c                                    | 21.97a                                       | 0.05b                                 | 0.022a                              | 23.80c               |
| 600                        | 147.80b                                   | 21.27a                                       | 0.08ab                                | 0.019ab                             | 21.16c               |
| 700                        | 200.61a                                   | 13.84b                                       | 0.10a                                 | 0.013b                              | 20.75c               |

<sup>1</sup> Different letters indicate significant differences between samples under different pyrolysis temperature ( $p < 0.05$ ).

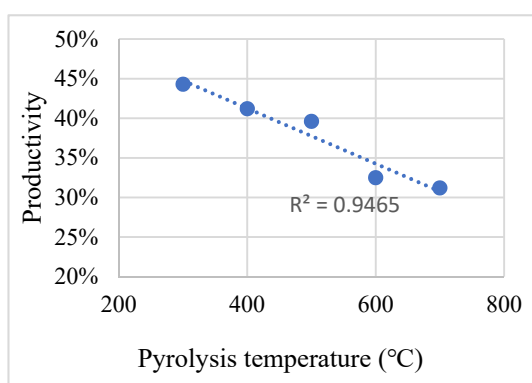

(a)

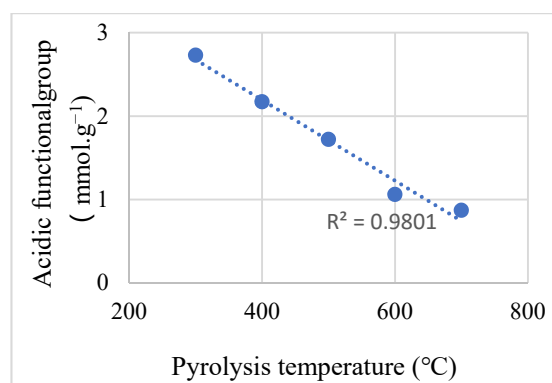

(b)

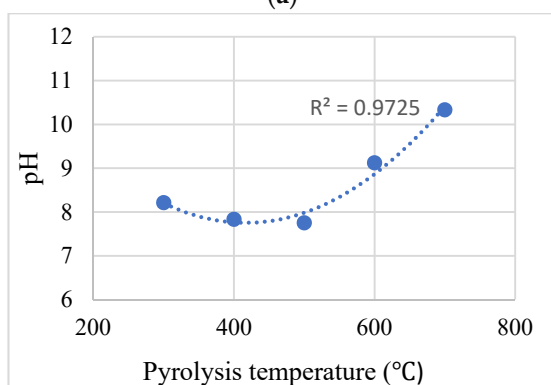

(c)

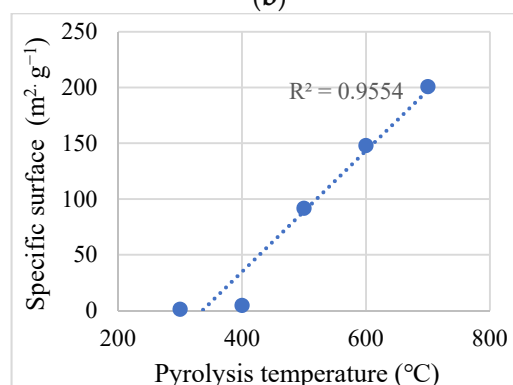

(d)

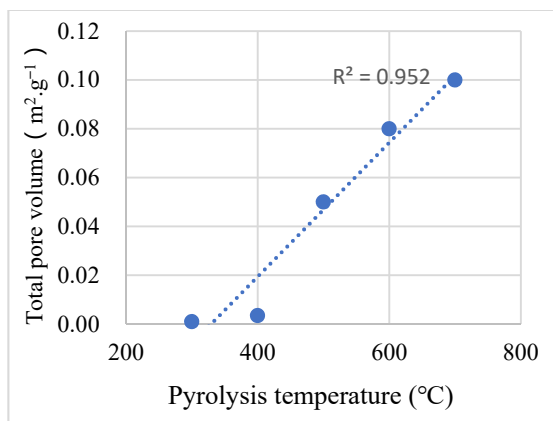

(e)

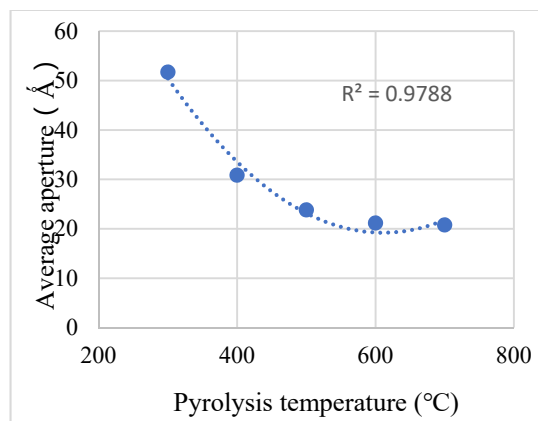

(f)

**Figure S1.** Relationship of the pyrolysis temperature and the physical and chemical properties.
